# Supplementary material for: Multi-Omics and miRNA Interaction Joint Analysis Highlight New Insights Into Anthocyanin Biosynthesis in Peanuts (Arachis hypogaea L.)
Source: Front Plant Sci. 2022 Feb 16;13:818345. doi: 10.3389/fpls.2022.818345 (PMC8888885; doi:10.3389/fpls.2022.818345)
Supplement: Supplementary file 1 [file Data_Sheet_1.CSV]

## Sheet: sheet1
Table S1: Gene primer design for qRT-PCR
Primer name	Sequence (5'to3')
AhACT7-qF	TAAGAACAATGTTGCCATACAGA
AhACT7-qR	GTTGCCTTGGATTATGAGC
4WXU8P-F	CCTAATGCCTTGGTTATTC
4WXU8P-R	CCTTCACTGTTGTTCTATG
79B99S-F	GCAATGGTAGGTTCAAGA
79B99S-R	GAATGTGGCGATGGATAA
7JZ58T-F	AATGACTGGCTGGATGTA
7JZ58T-R	GAGGTGGAATAATTGTGATGA
EEZ4Y8-F	TTCAAGAGCACAATCAAG
EEZ4Y8-R	GCATCAATGGATACCTAAC
JB63H4-F	GATAACTACTTGAACTACCATAA
JB63H4-R	CCATAGAGTGTTGTCGTA
JV9T2X-F	AGAACTGGAACCTCATCA
JV9T2X-R	GTGTTGTGGAGATTGTTATTG
R4ID1P-F	AACAGCACAAGATAGAAG
R4ID1P-R	TATGATGATGATGATGATGAT
T1J2UZ-F	TTGTTGATGGCAATGATA
T1J2UZ-R	TCTTCTGAGATGGTAACT
TJ3PHW-F	TGATAGGTGAGGCAAGTT
TJ3PHW-R	AGTGAGTGAATGGAAGGA
UDJX6I-F	CCTTATGTCAAGCGTTAC
UDJX6I-R	TTCTCAGCCAAATCTTTT
UQ0Z3E-F	CTACTTCTTCCACCTTGT
UQ0Z3E-R	CATACTCGCTTGTAACCT
W8TDEC-F	ACTGGACTGATATTGAAT
W8TDEC-R	GTATGAGAGTGATGAGAT
X2F5F9-F	TAAGAATCCAGAGGCTACA
X2F5F9-R	TTAAGACGGTCAACAACAT
21440-F	TGTTCCTTCACTTACCTA
21440-R	GTCCTTAGCATTACCAATA
