# Supplementary material for: Multi-Omics and miRNA Interaction Joint Analysis Highlight New Insights Into Anthocyanin Biosynthesis in Peanuts (Arachis hypogaea L.)
Source: Front Plant Sci. 2022 Feb 16;13:818345. doi: 10.3389/fpls.2022.818345 (PMC8888885; doi:10.3389/fpls.2022.818345)
Supplement: Supplementary file 5 [file Data_Sheet_5.CSV]

## Sheet: G1_vs_G2
Table S5: Abundance of metabolites in G1_vs_G2
ID	name	G1-1	G1-2	G1-3	G2-1	G2-2	G2-3
pma1590	Peonidin O-hexoside	0.00157353	0.00146313	0.00108182	0.00153926	0.00172962	0.00185753
pmb0545	Rosinidin O-hexoside	0.000227123	0.000329894	0.000276417	0.000314212	0.000241673	0.000268749
pmb0550	Cyanidin 3-O-glucoside (Kuromanin)	0.000779342	0.000470685	0.000516353	0.00103932	0.000940631	0.000970922
pmb2957	Cyanidin O-syringic acid	0.00904037	0.00570067	0.00552835	0.00236613	0.00241673	0.0022264
pme0430	Procyanidin A1	0.0492841	0.0461023	0.0367621	0.0442695	0.045373	0.0430789
pme0432	Procyanidin A2	0.0828329	0.0826804	0.063141	0.0835778	0.079847	0.0820739
pme0434	Procyanidin B2	0.42604	0.432036	0.461631	0.440151	0.437145	0.436059
pme0436	Procyanidin B3	0.374084	0.386486	0.391475	0.393083	0.393312	0.392585
pme0442	Delphinidin	0.0252358	0.0151834	0.0162764	0.0102532	0.0105318	0.009011
pme0443	Malvidin 3-O-galactoside	0.00113264	0.000864073	0.00105235	0.000905744	0.000752268	0.000760139
pme0444	Malvidin 3-O-glucoside (Oenin)	0.00158837	0.00121053	0.00121652	0.000978254	0.000989203	0.000866848
pme3391	Petunidin 3-O-glucoside	0.00950055	0.00927567	0.00614573	0.00594076	0.00546135	0.0106973
pme3609	Cyanidin	0.0167744	0.0161496	0.0135964	0.0126575	0.0184809	0.0165992
pmf0027	Cyanidin 3-O-galactoside	0.000767466	0.000768831	0.000594929	0.00101642	0.000646832	0.000758821
pmf0203	Peonidin 3-O-glucoside chloride	0.00113858	0.00127817	0.000705777	0.00190817	0.00213241	0.00218688
pmf0617	Peonidin 3-sophoroside-5-glucoside.	1.33602e-07	1.24228e-07	1.26282e-07	1.1449e-07	1.06621e-07	1.18566e-07

## Sheet: Z1_vs_Z2
Continue: Abundance of metabolites in Z1_vs_Z2
ID	name	Z1-1	Z1-2	Z1-3	Z2-1	Z2-2	Z2-3
pma1590	Peonidin O-hexoside	0.0150497	0.0188642	0.00351237	0.0169585	0.00356207	0.010392
pmb0545	Rosinidin O-hexoside	0.00136652	0.00235803	0.000981317	0.0022398	0.00182619	0.000536226
pmb0550	Cyanidin 3-O-glucoside (Kuromanin)	0.292277	0.213442	0.273482	0.120522	0.107364	0.110155
pmb2957	Cyanidin O-syringic acid	0.0112552	0.00792786	0.00833852	0.00515153	0.00390323	0.00399052
pme0430	Procyanidin A1	0.0169726	0.0296787	0.00772184	0.0501288	0.0543843	0.053103
pme0432	Procyanidin A2	0.0302532	0.0528524	0.0137545	0.0831925	0.0911088	0.0935279
pme0434	Procyanidin B2	0.193569	0.186203	0.122262	0.26131	0.284966	0.277466
pme0436	Procyanidin B3	0.162547	0.158557	0.108857	0.225046	0.249847	0.249408
pme0442	Delphinidin	0.0333298	0.0268328	0.0345874	0.0118389	0.0099136	0.0092073
pme0443	Malvidin 3-O-galactoside	0.00140754	0.000514295	0.00105907	0.00096098	0.000149507	0.000707694
pme0444	Malvidin 3-O-glucoside (Oenin)	0.00174084	0.00108347	0.00133255	0.000686871	0.000367245	0.000567402
pme3391	Petunidin 3-O-glucoside	0.0136396	0.0100826	0.0109393	0.0118389	0.00657227	0.00829281
pme3609	Cyanidin	0.00910161	0.00959474	0.0100813	0.0113056	0.0158537	0.0150684
pmf0027	Cyanidin 3-O-galactoside	0.203056	0.264262	0.396817	0.18025	0.165561	0.156919
pmf0203	Peonidin 3-O-glucoside chloride	0.0103066	0.0132944	0.00289569	0.0167451	0.00372262	0.00993474
pmf0617	Peonidin 3-sophoroside-5-glucoside.	0.00412777	0.0044518	0.00337831	0.00182383	0.000899047	0.000724321

## Sheet: G1_vs_Z1
Continue: Abundance of metabolites in G1_vs_Z1
ID	name	G1-1	G1-2	G1-3	Z1-1	Z1-2	Z1-3
pma1590	Peonidin O-hexoside	0.00157353	0.00146313	0.00108182	0.0150497	0.0188642	0.00351237
pmb0545	Rosinidin O-hexoside	0.000227123	0.000329894	0.000276417	0.00136652	0.00235803	0.000981317
pmb0550	Cyanidin 3-O-glucoside (Kuromanin)	0.000779342	0.000470685	0.000516353	0.292277	0.213442	0.273482
pmb2957	Cyanidin O-syringic acid	0.00904037	0.00570067	0.00552835	0.0112552	0.00792786	0.00833852
pme0430	Procyanidin A1	0.0492841	0.0461023	0.0367621	0.0169726	0.0296787	0.00772184
pme0432	Procyanidin A2	0.0828329	0.0826804	0.063141	0.0302532	0.0528524	0.0137545
pme0434	Procyanidin B2	0.42604	0.432036	0.461631	0.193569	0.186203	0.122262
pme0436	Procyanidin B3	0.374084	0.386486	0.391475	0.162547	0.158557	0.108857
pme0442	Delphinidin	0.0252358	0.0151834	0.0162764	0.0333298	0.0268328	0.0345874
pme0443	Malvidin 3-O-galactoside	0.00113264	0.000864073	0.00105235	0.00140754	0.000514295	0.00105907
pme0444	Malvidin 3-O-glucoside (Oenin)	0.00158837	0.00121053	0.00121652	0.00174084	0.00108347	0.00133255
pme3391	Petunidin 3-O-glucoside	0.00950055	0.00927567	0.00614573	0.0136396	0.0100826	0.0109393
pme3609	Cyanidin	0.0167744	0.0161496	0.0135964	0.00910161	0.00959474	0.0100813
pmf0027	Cyanidin 3-O-galactoside	0.000767466	0.000768831	0.000594929	0.203056	0.264262	0.396817
pmf0203	Peonidin 3-O-glucoside chloride	0.00113858	0.00127817	0.000705777	0.0103066	0.0132944	0.00289569
pmf0617	Peonidin 3-sophoroside-5-glucoside.	1.33602e-07	1.24228e-07	1.26282e-07	0.00412777	0.0044518	0.00337831

## Sheet: G2_vs_Z2
Continue: Abundance of metabolites in G2_vs_Z2
ID	name	G2-1	G2-2	G2-3	Z2-1	Z2-2	Z2-3
pma1590	Peonidin O-hexoside	0.00153926	0.00172962	0.00185753	0.0169585	0.00356207	0.010392
pmb0545	Rosinidin O-hexoside	0.000314212	0.000241673	0.000268749	0.0022398	0.00182619	0.000536226
pmb0550	Cyanidin 3-O-glucoside (Kuromanin)	0.00103932	0.000940631	0.000970922	0.120522	0.107364	0.110155
pmb2957	Cyanidin O-syringic acid	0.00236613	0.00241674	0.0022264	0.00515153	0.00390323	0.00399052
pme0430	Procyanidin A1	0.0442695	0.045373	0.0430789	0.0501288	0.0543843	0.053103
pme0432	Procyanidin A2	0.0835778	0.079847	0.0820739	0.0831925	0.0911088	0.0935279
pme0434	Procyanidin B2	0.440151	0.437145	0.436059	0.26131	0.284966	0.277466
pme0436	Procyanidin B3	0.393083	0.393312	0.392585	0.225046	0.249847	0.249408
pme0442	Delphinidin	0.0102532	0.0105318	0.009011	0.0118389	0.0099136	0.0092073
pme0443	Malvidin 3-O-galactoside	0.000905744	0.000752268	0.000760139	0.00096098	0.000149507	0.000707694
pme0444	Malvidin 3-O-glucoside (Oenin)	0.000978254	0.000989203	0.000866848	0.000686871	0.000367245	0.000567402
pme3391	Petunidin 3-O-glucoside	0.00594076	0.00546135	0.0106973	0.0118389	0.00657227	0.00829281
pme3609	Cyanidin	0.0126575	0.0184809	0.0165992	0.0113056	0.0158537	0.0150684
pmf0027	Cyanidin 3-O-galactoside	0.00101642	0.000646832	0.000758821	0.18025	0.165561	0.156919
pmf0203	Peonidin 3-O-glucoside chloride	0.00190817	0.00213241	0.00218688	0.0167451	0.00372262	0.00993474
pmf0617	Peonidin 3-sophoroside-5-glucoside.	1.14e-07	1.07e-07	1.19e-07	0.00182383	0.000899047	0.000724321
