# Supplementary material for: Multi-Omics and miRNA Interaction Joint Analysis Highlight New Insights Into Anthocyanin Biosynthesis in Peanuts (Arachis hypogaea L.)
Source: Front Plant Sci. 2022 Feb 16;13:818345. doi: 10.3389/fpls.2022.818345 (PMC8888885; doi:10.3389/fpls.2022.818345)
Supplement: Supplementary file 6 [file Data_Sheet_6.xlsx]

## Sheet: Sheet1
Table S6: Total anthocyanin content
sample	OD_value	repeat 1	average value	repeat 2	average value	repeat 3	average value	p.value
F1	530nm	0.182	3.515	0.174	3.315	0.191	3.635	0.79949	1.84259e-08
	657nm	0.025		0.033		0.037
F2	530nm	0.172	3.205	0.188	3.54	0.191	3.595
	657nm	0.047		0.044		0.045
Z1	530nm	1.21	22.6	1.225	22.65	1.235	22.75	1.80205e-05
	657nm	0.32		0.37		0.39
Z2	530nm	1.54	28.97	1.512	28.37	1.557	29.23
	657nm	0.366		0.374		0.382
