# Supplementary material for: Multi-Omics and miRNA Interaction Joint Analysis Highlight New Insights Into Anthocyanin Biosynthesis in Peanuts (Arachis hypogaea L.)
Source: Front Plant Sci. 2022 Feb 16;13:818345. doi: 10.3389/fpls.2022.818345 (PMC8888885; doi:10.3389/fpls.2022.818345)
Supplement: Supplementary file 7 [file Data_Sheet_7.xlsx]

## Sheet: G1_vs_G2
Table S7: Correlation analysis of DAMs and DEGs in G1_vs_G2
DAMs	Target DEGs	R2
pmb0550	arahy.1DT180(Ah4CL)	0.82
pmb0550	arahy.7MKL11(Ah4CL)	0.85
pmb0550	arahy.VGN2GE(Ah4CL)	-0.82
pmf0203	arahy.1KSV8R(Ah4CL)	-0.91
pmf0203	arahy.WI4YKF(Ah4CL)	-0.89
pmf0203	arahy.B5L4K2(Ah4CL)	0.86
pmf0203	arahy.DK6AU1(Ah4CL)	-0.83
pmb0550	arahy.6RSG0I(AhANR)	-0.89
pmb0550	arahy.5F9GBV(AhbZIP)	0.89
pmb0550	arahy.R4ID1P(AhbZIP)	0.91
pmb0550	arahy.W4QI9P(AhbZIP)	0.87
pmb0550	arahy.J5JSS9(AhC-CoA)	0.83
pmf0203	arahy.TJ3PHW(AhCHI)	-0.83
pmf0203	arahy.SNS0I7(AhCHI)	-0.9
pmb0550	arahy.6J3HHE(AhCHS)	-0.94
pmb0550	arahy.0BML12(AhCHS)	0.85
pmb0550	arahy.JH8TMD(AhCHS)	-0.87
pmf0203	arahy.67HPDN(AhCHS)	-0.95
pmf0203	arahy.RZQZ1K(AhCHS)	-0.87
pmf0203	arahy.90SQMT(AhCHS)	-0.82
pmb0550	arahy.4WXU8P(AhFLS)	-0.92
pmf0203	noval Gene(Ah21440)	0.89
pmb0550	arahy.5H4H17(AhPAL)	0.91
pmb0550	arahy.EEZ4Y8(AhPAL)	0.91
pmb0550	arahy.FI9C9D(AhPAL)	0.92

## Sheet: Z1_vs_Z2
Continue: Correlation analysis of DAMs and DEGs in Z1_vs_Z2
DAMs	Target DEGs	R2
pmb0550	arahy.1DT180(Ah4CL)	-0.9
pmb0550	arahy.B5L4K2(Ah4CL)	-0.89
pmb0550	arahy.ST1ALI(Ah4CL)	-0.92
pmb0550	arahy.X2F5F9(Ah4CL)	-0.81
pme0442	arahy.7MKL11(Ah4CL)	-0.82
pme0442	arahy.VGN2GE(Ah4CL)	0.83
pmb0550	arahy.IK60LM(AhANR)	0.84
pmb0550	arahy.W8TDEC(AhANR)	0.85
pmb0550	arahy.5F9GBV(AhbZIP)	-0.89
pmb0550	arahy.R4ID1P(AhbZIP)	-0.9
pmb0550	arahy.W4QI9P(AhbZIP)	-0.93
pmb0550	arahy.J5JSS9(AhC-CoA)	-0.83
pmb0550	arahy.QGH881(AhC-CoA)	-0.93
pmb0550	arahy.2GDU51(AhCHI)	-0.95
pmb0550	arahy.SNS0I7(AhCHI)	0.83
pmb0550	arahy.WYW97W(AhCHI)	0.89
pmb0550	arahy.0BML12(AhCHS)	-0.9
pmb0550	arahy.0FI6RG(AhCHS)	0.98
pmb0550	arahy.U6NA16(AhCHS)	-0.94
pmb0550	arahy.UDJX6I(AhCHS)	0.98
pmb0550	arahy.7JZ58T(AhDFR)	0.95
pmb0550	arahy.79B99S(AhF3H)	0.87
pmb0550	arahy.HE8J5U(AhF3H)	0.95
pmb0550	arahy.4WXU8P(AhFLS)	0.9
pmb0550	arahy.4Y1607(AhFLS)	0.98
pmb0550	noval Gene(Ah21440)	-0.87
pmb0550	arahy.UQ0Z3E(AhLDOX)	-0.98
pmb0550	arahy.M05HM0(AhLAR)	0.84
pmb0550	arahy.T1J2UZ(AhLAR)	0.84
pmb0550	arahy.5H4H17(AhPAL)	-0.93
pmb0550	arahy.EEZ4Y8(AhPAL)	-0.84
pmb0550	arahy.FI9C9D(AhPAL)	-0.94
pmb0550	arahy.NB2RRK(AhPAL)	0.92

## Sheet: G1_vs_Z1
Continue: Correlation analysis of DAMs and DEGs in G1_vs_Z1
DAMs	Target DEGs	R2
pmb0550	arahy.EQU2N6(Ah4CL)	-0.91
pmb0550	arahy.1KSV8R(Ah4CL)	-0.93
pmb0550	arahy.L700WL(Ah4CL)	-0.95
pmb0550	arahy.IMLK5J(Ah4CL)	-0.98
pmb0550	arahy.ST1ALI(Ah4CL)	-0.88
pmb0550	arahy.DK6AU1(Ah4CL)	-0.98
pmb0550	arahy.WI4YKF(Ah4CL)	-0.93
pmb0550	arahy.X2F5F9(Ah4CL)	-0.86
pmb0550	arahy.B5L4K2(Ah4CL)	-0.91
pmb0550	arahy.W8TDEC(AhANR)	0.88
pme0430	arahy.IK60LM(AhANR)	-0.81
pmb0550	arahy.JV9T2X(AhbHLH)	-0.94
pmb0550	arahy.R4ID1P(AhbZIP)	-0.84
pmb0550	arahy.5F9GBV(AhbZIP)	-0.87
pmb0550	arahy.333C3Q(AhC-CoA)	0.96
pmb0550	arahy.JB63H4(AhC-CoA)	0.99
pmb0550	arahy.2GDU51(AhCHI)	-0.98
pmb0550	arahy.425ZXH(AhCHI)	-0.98
pmb0550	arahy.6J3HHE(AhCHS)	0.98
pmb0550	arahy.4Y1607(AhFLS)	0.95
pme0442	arahy.4WXU8P(AhFLS)	-0.81
pmb0550	noval Gene(Ah21440)	-0.97
pmb0550	arahy.T1J2UZ(AhLAR)	0.84
pme0434	arahy.M05HM0(AhLAR)	-0.92

## Sheet: G2_vs_Z2
Continue: Correlation analysis of DAMs and DEGs in G2_vs_Z2
DAMs	Target DEGs	R2
pmb0550	arahy.RZQZ1K(AhCHS)	-0.99
pmb0550	arahy.CM90T6(AhCHS)	0.88
pmb0550	arahy.X3ZDBL(AhCHS)	-0.92
pmb0550	arahy.K3PS86(AhCHS)	0.88
pmb0550	arahy.90SQMT(AhCHS)	-0.97
pmb0550	arahy.ALW2B1(AhCHS)	0.98
pmb0550	arahy.67HPDN(AhCHS)	-0.97
pmb0550	noval Gene(Ah21793)	-0.96
pmb0550	arahy.4WXU8P(AhFLS)	-0.93
pmb0550	arahy.9YR5UX(AhHCT)	0.97
pmb0550	arahy.6JHV2K(AhCHI)	0.97
pmb0550	arahy.V1SQAY(AhPAL)	-0.89
pmb0550	arahy.EEZ4Y8(AhPAL)	-0.95
pmb0550	arahy.0B4MFB(AhPAL)	-0.86
pmb0550	arahy.7JZ58T(AhDFR)	-0.92
pmb0550	arahy.333C3Q(AhC-CoA)	0.99
pmb0550	arahy.JB63H4(AhC-CoA)	0.98
pmb0550	arahy.J5JSS9(AhC-CoA)	0.89
pmb0550	arahy.VGN2GE(Ah4CL)	0.9
pmb0550	arahy.Y23DM6(Ah4CL)	0.94
pmb0550	arahy.1KSV8R(Ah4CL)	-0.88
pmb0550	arahy.L700WL(Ah4CL)	-0.97
pmb0550	arahy.IMLK5J(Ah4CL)	-0.92
pmb0550	arahy.35X8AA(Ah4CL)	-0.97
pmb0550	arahy.DK6AU1(Ah4CL)	-0.98
pmb0550	arahy.WI4YKF(Ah4CL)	-0.9
pmb0550	arahy.X2F5F9(Ah4CL)	-0.97
pmb0550	arahy.B5L4K2(Ah4CL)	-0.94
pmb0550	noval Gene(Ah21440)	-0.89
