# Supplementary material for: Multi-Omics and miRNA Interaction Joint Analysis Highlight New Insights Into Anthocyanin Biosynthesis in Peanuts (Arachis hypogaea L.)
Source: Front Plant Sci. 2022 Feb 16;13:818345. doi: 10.3389/fpls.2022.818345 (PMC8888885; doi:10.3389/fpls.2022.818345)
Supplement: Supplementary file 8 [file Data_Sheet_8.xlsx]

## Sheet: G1_vs_G2
Table S8: Sequence list of miRNAs and DEGs in G1_vs_G2
miRNA	target	target_region(3'->5')	miRNA_sequence(5'->3')	KEGG	ko_name
AhmiR5658-z	arahy.2WN1K3.1	ACUACUACAACCCAUACU	UGAUGAUGAUGAUGAUGA	ko00360	AOC3
AhmiR5658-z	arahy.JV3LD5.1	ACUACUACAACCCAUACU	UGAUGAUGAUGAUGAUGA	ko00360	AOC3
AhmiR5658-z	arahy.0LDE9J.1	ACUACUACUACUACUACU	UGAUGAUGAUGAUGAUGA	ko00400	tyrAa
AhmiR5658-z	arahy.GA90U3.1	UCUACUACUACUACUACU	UGAUGAUGAUGAUGAUGA	ko00400	tyrAa
AhmiR2950-z	arahy.A5D6C6.1	ACACCUCCGCCACCGCCU	UGUGGAGGAGGUGGAAUA	ko00400	ADT
AhmiR2950-z	arahy.Z36GDV.1	ACACCUCCGCCACCGCCU	UGUGGAGGAGGUGGAAUA	ko00400	ADT
AhmiR2950-z	Ah21440.1	ACACCUCAACCACCUAAC	UGUGGAGGAGGUGGAAUA	ko00941	HCT
AhmiR2950-z	arahy.I7VPJ4.1	ACACCUCAACCACCUAAC	UGUGGAGGAGGUGGAAUA	ko00941	HCT
AhmiR482-z	arahy.AJ1Q9U.1	CCAUACCCUCCGAACUCU	GGAAUGGGCGGUUUGGGA	ko00941	CYP98A
AhmiR482-z	arahy.AXL13P.1	CCAUACCCUCCGAACUCU	GGAAUGGGCGGUUUGGGA	ko00941	CYP98A
AhmiR2950-z	arahy.J0SPDG.1	CCACCUGUUCCACCUUAC	UGUGGAGGAGGUGGAAUA	KO00943	CYP81E9
AhmiR5658-z	arahy.9P7KAZ.1	ACCACUACCACUACUACU	UGAUGAUGAUGAUGAUGA	KO00943	CYP81E
AhmiR5658-z	arahy.9WXZ62.1	ACGACUACCACUACUACU	UGAUGAUGAUGAUGAUGA	KO00943	CYP81E
AhmiR482-z	arahy.FQ5MDM.1	UCAUUCCCGCCAAACGCU	GGAAUGGGCGGUUUGGGA	KO00943	CYP81E
AhmiR482-z	arahy.RE0MA5.1	UCAUUCCCGCCAAACGCU	GGAAUGGGCGGUUUGGGA	KO00943	CYP81E
AhmiR5658-z	arahy.5F9GBV.1	ACUACUACUACUAAUACU	UGAUGAUGAUGAUGAUGA	KO04075	TGA
AhmiR5658-z	arahy.5F9GBV.2	ACUACUACUACUAAUACU	UGAUGAUGAUGAUGAUGA	KO04075	TGA
AhmiR5658-z	arahy.J1CFJJ.1	ACUAAGACUACUACUCUU	UGAUGAUGAUGAUGAUGA	KO04075	TGA
AhmiR5658-z	arahy.M165LK.1	ACUACUACAACAACAACU	UGAUGAUGAUGAUGAUGA	KO04075	TGA
AhmiR5658-z	arahy.W4QI9P.1	ACUACUACAACAACAACU	UGAUGAUGAUGAUGAUGA	KO04075	TGA
AhmiR5658-z	arahy.W4QI9P.1	UCUCCUACUACUACUUCC	UGAUGAUGAUGAUGAUGA	KO04075	TGA

## Sheet: Z1_vs_Z2
Continue: Sequence list of miRNAs and DEGs in Z1_vs_Z2
miRNA	target	target_region(3'->5')	miRNA_sequence(5'->3')	KEGG	ko_name
AhmiR5658-z	arahy.2WN1K3.1	ACUACUACAACCCAUACU	UGAUGAUGAUGAUGAUGA	ko00360	AOC3
AhmiR4993-z	arahy.8SQ1RZ.1	CCUCCUCCGCCGCCGCCU	GGCGGCGGCGGUGGAGGA	ko00360	AOC3
AhmiR319-x	arahy.A0H1CK.1	CGUAACGAACGUCGGGUU	GAGUUCCUUGCAGCCCAA	ko00360	AOC3
AhmiR408-y	arahy.A0H1CK.1	ACGUUGUGGAGAAGGGAUA	UGCACUGCCUCUUCCCUUU	ko00360	AOC3
AhmiR5658-z	arahy.JV3LD5.1	ACUACUACAACCCAUACU	UGAUGAUGAUGAUGAUGA	ko00360	AOC3
AhmiR408-y	arahy.N9KEBQ.1	ACGUUGUGGAGAAGGGAUA	UGCACUGCCUCUUCCCUUU	ko00360	AOC3
AhmiR408-y	arahy.N9KEBQ.2	ACGUUGUGGAGAAGGGAUA	UGCACUGCCUCUUCCCUUU	ko00360	AOC3
AhmiR319-x	arahy.N9KEBQ.1	CGUAACGAACGUCGGGUU	GAGUUCCUUGCAGCCCAA	ko00360	AOC3
AhmiR319-x	arahy.N9KEBQ.2	CGUAACGAACGUCGGGUU	GAGUUCCUUGCAGCCCAA	ko00360	AOC3
AhmiR4993-z	arahy.X6CF9Y.1	CCUCCUCCGCCGCCGCCU	GGCGGCGGCGGUGGAGGA	ko00360	AOC3
AhmiR4993-z	arahy.2R4ARY.1	CAACCGCUGCCACCUCCA	GGCGGCGGCGGUGGAGGA	ko00360	MIF
AhmiR4993-z	arahy.XPD3NZ.1	CAACCGCUGCCACCUCCA	GGCGGCGGCGGUGGAGGA	ko00360	MIF
AhmiR4993-z	arahy.A5D6C6.1	CCGCCACCGCCUCCUCCU	GGCGGCGGCGGUGGAGGA	ko00400	ADT
AhmiR2950-z	arahy.A5D6C6.1	ACACCUCCGCCACCGCCU	UGUGGAGGAGGUGGAAUA	ko00400	ADT
AhmiR4993-z	arahy.Z36GDV.1	CCGCCACCGCCUCCUCCU	GGCGGCGGCGGUGGAGGA	ko00400	ADT
AhmiR2950-z	arahy.Z36GDV.1	ACACCUCCGCCACCGCCU	UGUGGAGGAGGUGGAAUA	ko00400	ADT
AhmiR5658-z	arahy.0LDE9J.1	ACUACUACUACUACUACU	UGAUGAUGAUGAUGAUGA	ko00400	tyrAa
AhmiR5658-z	arahy.GA90U3.1	UCUACUACUACUACUACU	UGAUGAUGAUGAUGAUGA	ko00400	tyrAa
AhmiR2628-z	arahy.6CB090.1	UCUCUUACUACUACUUGA	AGAGAAUGAUGAGUAAUA	ko00400	TRP3
AhmiR2628-z	arahy.6CB090.2	UCUCUUACUACUACUUGA	AGAGAAUGAUGAGUAAUA	ko00400	TRP3
AhmiR2628-z	arahy.FF66V7.1	UCUCUUACUACUACUUGA	AGAGAAUGAUGAGUAAUA	ko00400	TRP3
AhmiR5139-z	arahy.SGZ2CH.3	UUAGACCGAGACAAUGAA	AACCUGGCUCUGAUACCA	ko00941	CYP73A
AhmiR5139-z	arahy.SGZ2CH.1	UUAGACCGAGACAAUGAA	AACCUGGCUCUGAUACCA	ko00941	CYP73A
AhmiR8155-z	arahy.SGZ2CH.1	UUAGACCGAGACAAUGAA	AACCUGGCUCUGAUACCA	ko00941	CYP73A
AhmiR8155-z	arahy.SGZ2CH.3	UUAGACCGAGACAAUGAA	AACCUGGCUCUGAUACCA	ko00941	CYP73A
AhmiR2950-z	Ah21440.1	ACACCUCAACCACCUAAC	UGUGGAGGAGGUGGAAUA	ko00941	HCT
AhmiR2950-z	arahy.I7VPJ4.1	ACACCUCAACCACCUAAC	UGUGGAGGAGGUGGAAUA	ko00941	HCT
AhmiR482-z	arahy.AJ1Q9U.1	CCAUACCCUCCGAACUCU	GGAAUGGGCGGUUUGGGA	ko00941	CYP98A
AhmiR482-z	arahy.AXL13P.1	CCAUACCCUCCGAACUCU	GGAAUGGGCGGUUUGGGA	ko00941	CYP98A
AhmiR5227-z	arahy.K8H9R8.1	CUUUUCUACUUCUCUCGAU	GAAGAGAAGAAGAGAGAUG	ko00941	CYP75B1
AhmiR4993-z	arahy.E7XD18.2	CCGCCGCGGCCUCCACUU	GGCGGCGGCGGUGGAGGA	ko00941	PGT1
AhmiR2950-z	arahy.J0SPDG.1	CCACCUGUUCCACCUUAC	UGUGGAGGAGGUGGAAUA	ko00943	CYP81E9
AhmiR4993-z	arahy.0AN8KE.1	CCUUCACCGCCACCUCCC	GGCGGCGGCGGUGGAGGA	ko00943	CYP81E
AhmiR4993-z	arahy.0UU5IV.1	CCUUCACCGCCACCUCCC	GGCGGCGGCGGUGGAGGA	ko00943	CYP81E
AhmiR5658-z	arahy.9P7KAZ.1	ACCACUACCACUACUACU	UGAUGAUGAUGAUGAUGA	ko00943	CYP81E
AhmiR5658-z	arahy.9WXZ62.1	ACGACUACCACUACUACU	UGAUGAUGAUGAUGAUGA	ko00943	CYP81E
AhmiR482-z	arahy.FQ5MDM.1	UCAUUCCCGCCAAACGCU	GGAAUGGGCGGUUUGGGA	ko00943	CYP81E
AhmiR482-z	arahy.RE0MA5.1	UCAUUCCCGCCAAACGCU	GGAAUGGGCGGUUUGGGA	ko00943	CYP81E
AhmiR171-z	arahy.KS67M3.1	AACGCGGCGCAGUUGGAGACU	UUGAGCCGCGUCAAUAUCUUA	ko04075	NPR1
AhmiR171-z	arahy.VK3CXU.1	AACGCGGCGCAGUUGGAGACU	UUGAGCCGCGUCAAUAUCUUA	ko04075	NPR1
AhmiR171-z	arahy.VK3CXU.2	AACGCGGCGCAGUUGGAGACU	UUGAGCCGCGUCAAUAUCUUA	ko04075	NPR1
AhmiR4993-z	arahy.0U8Z8Z.2	UCGCCGCCGCCACCGUCA	GGCGGCGGCGGUGGAGGA	ko04075	TGA
AhmiR5658-z	arahy.5F9GBV.2	ACUACUACUACUAAUACU	UGAUGAUGAUGAUGAUGA	ko04075	TGA
AhmiR5658-z	arahy.5F9GBV.1	ACUACUACUACUAAUACU	UGAUGAUGAUGAUGAUGA	ko04075	TGA
AhmiR5658-z	arahy.J1CFJJ.1	ACUAAGACUACUACUCUU	UGAUGAUGAUGAUGAUGA	ko04075	TGA
AhmiR5658-z	arahy.M165LK.1	ACUACUACAACAACAACU	UGAUGAUGAUGAUGAUGA	ko04075	TGA
AhmiR5658-z	arahy.M165LK.1	UCUCCUACUACUACUUCC	UGAUGAUGAUGAUGAUGA	ko04075	TGA
AhmiR5658-z	arahy.W4QI9P.1	ACUACUACAACAACAACU	UGAUGAUGAUGAUGAUGA	ko04075	TGA
AhmiR5658-z	arahy.W4QI9P.1	UCUCCUACUACUACUUCC	UGAUGAUGAUGAUGAUGA	ko04075	TGA
AhmiR11432-z	arahy.9NLX2S.1	GCCUCCUUGGGGUUGGUAACG	AGGUGGAACCCCAACCAGUGA	ko04075	PR1
AhmiR5227-z	arahy.D66PR5.1	CUUCUCCCCUUCUCUCUUC	GAAGAGAAGAAGAGAGAUG	ko04075	PR1
AhmiR11432-z	arahy.J1VRTE.1	GCCUCCUUGGGGUUGGUAACG	AGGUGGAACCCCAACCAGUGA	ko04075	PR1
AhmiR11432-z	arahy.J8AXIX.1	GCCUCCUUGGGGUUGGUAACG	AGGUGGAACCCCAACCAGUGA	ko04075	PR1
AhmiR11432-z	arahy.JD0BX4.1	GCCUCCUUGGGGUUGGUAACG	AGGUGGAACCCCAACCAGUGA	ko04075	PR1

## Sheet: G1_vs_Z1
Continue: Sequence list of miRNAs and DEGs in G1_vs_Z1
miRNA	target	target_region(3'->5')	miRNA_sequence(5'->3')	KEGG	ko_name
AhmiR5658-z	arahy.2WN1K3.1	ACUACUACAACCCAUACU	UGAUGAUGAUGAUGAUGA	ko00360	AOC3
AhmiR319-x	arahy.A0H1CK.1	CGUAACGAACGUCGGGUU	GAGUUCCUUGCAGCCCAA	ko00360	AOC3
AhmiR5658-z	arahy.JV3LD5.1	ACUACUACAACCCAUACU	UGAUGAUGAUGAUGAUGA	ko00360	AOC3
AhmiR319-x	arahy.N9KEBQ.1	CGUAACGAACGUCGGGUU	GAGUUCCUUGCAGCCCAA	ko00360	AOC3
AhmiR319-x	arahy.N9KEBQ.2	CGUAACGAACGUCGGGUU	GAGUUCCUUGCAGCCCAA	ko00360	AOC3
AhmiR408-y	arahy.N9KEBQ.1	ACGUUGUGGAGAAGGGAUA	UGCACUGCCUCUUCCCUUU	ko00360	AOC3
AhmiR408-y	arahy.N9KEBQ.2	ACGUUGUGGAGAAGGGAUA	UGCACUGCCUCUUCCCUUU	ko00360	AOC3
AhmiR4993-z	arahy.A5D6C6.1	CCGCCACCGCCUCCUCCU	GGCGGCGGCGGUGGAGGA	ko00400	ADT
AhmiR2950-z	arahy.A5D6C6.1	ACACCUCCGCCACCGCCU	UGUGGAGGAGGUGGAAUA	ko00400	ADT
AhmiR4993-z	arahy.Z36GDV.1	CCGCCACCGCCUCCUCCU	GGCGGCGGCGGUGGAGGA	ko00400	ADT
AhmiR2950-z	arahy.Z36GDV.1	ACACCUCCGCCACCGCCU	UGUGGAGGAGGUGGAAUA	ko00400	ADT
AhmiR5658-z	arahy.0LDE9J.1	ACUACUACUACUACUACU	UGAUGAUGAUGAUGAUGA	ko00400	tyrAa
AhmiR5658-z	arahy.GA90U3.1	UCUACUACUACUACUACU	UGAUGAUGAUGAUGAUGA	ko00400	tyrAa
AhmiR0050-3p	arahy.SNS0I7.1	UGACACGAGGGAACUAGAGAA	ACUGUGUUCCCUUGAUCAAAU	ko00941	CHI
AhmiR0050-3p	arahy.TJ3PHW.1	UGACACGAGGGAACUAGAGAA	ACUGUGUUCCCUUGAUCAAAU	ko00941	CHI
AhmiR0051-3p	arahy.TJ3PHW.1	UGACACGAGGGAACUAGAGAA	ACUGUGUUCCCUUGAUCAAAU	ko00941	CHI
AhmiR2950-z	Ah21440.1	ACACCUCAACCACCUAAC	UGUGGAGGAGGUGGAAUA	ko00941	HCT
AhmiR2950-z	arahy.I7VPJ4.1	ACACCUCAACCACCUAAC	UGUGGAGGAGGUGGAAUA	ko00941	HCT
AhmiR2950-z	arahy.J0SPDG.1	CCACCUGUUCCACCUUAC	UGUGGAGGAGGUGGAAUA	ko00943	CYP81E9
AhmiR5658-z	arahy.9P7KAZ.1	ACCACUACCACUACUACU	UGAUGAUGAUGAUGAUGA	ko00943	CYP81E
AhmiR5658-z	arahy.9WXZ62.1	ACGACUACCACUACUACU	UGAUGAUGAUGAUGAUGA	ko00943	CYP81E
AhmiR5658-z	arahy.5F9GBV.1	ACUACUACUACUAAUACU	UGAUGAUGAUGAUGAUGA	ko04075	TGA
AhmiR5658-z	arahy.5F9GBV.2	ACUACUACUACUAAUACU	UGAUGAUGAUGAUGAUGA	ko04075	TGA
AhmiR5658-z	arahy.J1CFJJ.1	ACUAAGACUACUACUCUU	UGAUGAUGAUGAUGAUGA	ko04075	TGA
AhmiR5658-z	arahy.M165LK.1	ACUACUACAACAACAACU	UGAUGAUGAUGAUGAUGA	ko04075	TGA
AhmiR5658-z	arahy.W4QI9P.1	ACUACUACAACAACAACU	UGAUGAUGAUGAUGAUGA	ko04075	TGA
AhmiR5658-z	arahy.W4QI9P.1	UCUCCUACUACUACUUCC	UGAUGAUGAUGAUGAUGA	ko04075	TGA

## Sheet: G2_vs_Z2
Continue: Sequence list of miRNAs and DEGs in G2_vs_Z2
miRNA	target	target_region(3'->5')	miRNA_sequence(5'->3')	KEGG	ko_name
AhmiR4993-z	arahy.8SQ1RZ.1	CCUCCUCCGCCGCCGCCU	GGCGGCGGCGGUGGAGGA	ko00360	AOC3
AhmiR4993-z	arahy.X6CF9Y.1	CCUCCUCCGCCGCCGCCU	GGCGGCGGCGGUGGAGGA	ko00360	AOC3
AhmiR4993-z	arahy.2R4ARY.1	CAACCGCUGCCACCUCCA	GGCGGCGGCGGUGGAGGA	ko00360	MIF
AhmiR4993-z	arahy.XPD3NZ.1	CAACCGCUGCCACCUCCA	GGCGGCGGCGGUGGAGGA	ko00360	MIF
AhmiR2628-z	arahy.6CB090.1	UCUCUUACUACUACUUGA	AGAGAAUGAUGAGUAAUA	ko00400	TRP3
AhmiR2628-z	arahy.6CB090.2	UCUCUUACUACUACUUGA	AGAGAAUGAUGAGUAAUA	ko00400	TRP3
AhmiR2628-z	arahy.FF66V7.1	UCUCUUACUACUACUUGA	AGAGAAUGAUGAGUAAUA	ko00400	TRP3
AhmiR4993-z	arahy.A5D6C6.1	CCGCCACCGCCUCCUCCU	GGCGGCGGCGGUGGAGGA	ko00400	ADT
AhmiR4993-z	arahy.Z36GDV.1	CCGCCACCGCCUCCUCCU	GGCGGCGGCGGUGGAGGA	ko00400	ADT
AhmiR414-z	arahy.SGZ2CH.1	CUAGGAGGAGUAGAAGGAGGU	CAUCCUCCUCAUCGUCGUCCU	ko00941	CYP73A
AhmiR414-z	arahy.SGZ2CH.2	CUAGGAGGAGUAGAAGGAGGU	CAUCCUCCUCAUCGUCGUCCU	ko00941	CYP73A
AhmiR398-x	arahy.UDJX6I.1	CCUGCCUUUGACUCAUGUGA	GGAGUGAAACUGAGAACACA	ko00941	CHS
AhmiR11592-z	arahy.AJ1Q9U.1	GCUAGGUUUGGUGUGGCU	CGAACCGAACCGAACCGA	ko00941	CYP98A
AhmiR11592-z	arahy.AXL13P.1	GCUAGGUUUGGUGUGGCU	CGAACCGAACCGAACCGA	ko00941	CYP98A
AhmiR4993-z	arahy.E7XD18.2	CCGCCGCGGCCUCCACUU	GGCGGCGGCGGUGGAGGA	ko00941	PGT1
AhmiR0050-3p	arahy.TJ3PHW.1	UGACACGAGGGAACUAGAGAA	ACUGUGUUCCCUUGAUCAAAU	ko00941	CHI
AhmiR0051-3p	arahy.TJ3PHW.1	UGACACGAGGGAACUAGAGAA	ACUGUGUUCCCUUGAUCAAAU	ko00941	CHI
AhmiR0050-3p	arahy.SNS0I7.1	UGACACGAGGGAACUAGAGAA	ACUGUGUUCCCUUGAUCAAAU	ko00941	CHI
AhmiR11592-z	arahy.Q2BYIT.1	GCUUGGCUUGGCUUGGCC	CGAACCGAACCGAACCGA	ko00941	CYP93B2_16
AhmiR11592-z	arahy.Q2QWLN.1	GCUUGGCUUGGCUUGGCC	CGAACCGAACCGAACCGA	ko00941	CYP93B2_16
AhmiR11592-z	arahy.Q2BYIT.1	GCUUGGCUUGGCUUGGCC	CGAACCGAACCGAACCGA	ko00943	CYP93B2_16
AhmiR11592-z	arahy.Q2QWLN.1	GCUUGGCUUGGCUUGGCC	CGAACCGAACCGAACCGA	ko00943	CYP93B2_16
AhmiR4993-z	arahy.0AN8KE.1	CCUUCACCGCCACCUCCC	GGCGGCGGCGGUGGAGGA	ko00943	CYP81E
AhmiR4993-z	arahy.0UU5IV.1	CCUUCACCGCCACCUCCC	GGCGGCGGCGGUGGAGGA	ko00943	CYP81E
AhmiR171-z	arahy.KS67M3.1	AACGCGGCGCAGUUGGAGACU	UUGAGCCGCGUCAAUAUCUUA	ko04075	NPR1
AhmiR171-z	arahy.VK3CXU.1	AACGCGGCGCAGUUGGAGACU	UUGAGCCGCGUCAAUAUCUUA	ko04075	NPR1
AhmiR171-z	arahy.VK3CXU.2	AACGCGGCGCAGUUGGAGACU	UUGAGCCGCGUCAAUAUCUUA	ko04075	NPR1
AhmiR4993-z	arahy.0U8Z8Z.2	UCGCCGCCGCCACCGUCA	GGCGGCGGCGGUGGAGGA	ko04075	TGA
